# Supplementary material for: ChromaFactor: deconvolution of single-molecule chromatin organization with non-negative matrix factorization
Source: PubMed Central journal article supplement — bioRxiv. 2023 Nov 22:2023.11.22.568268. Preprint. [Version 1] doi: 10.1101/2023.11.22.568268 (PMC10690235; doi:10.1101/2023.11.22.568268), 2023-11-22
Supplement: media-1.pdf [file media-1.pdf]

## ChromaFactor Supplementary Information

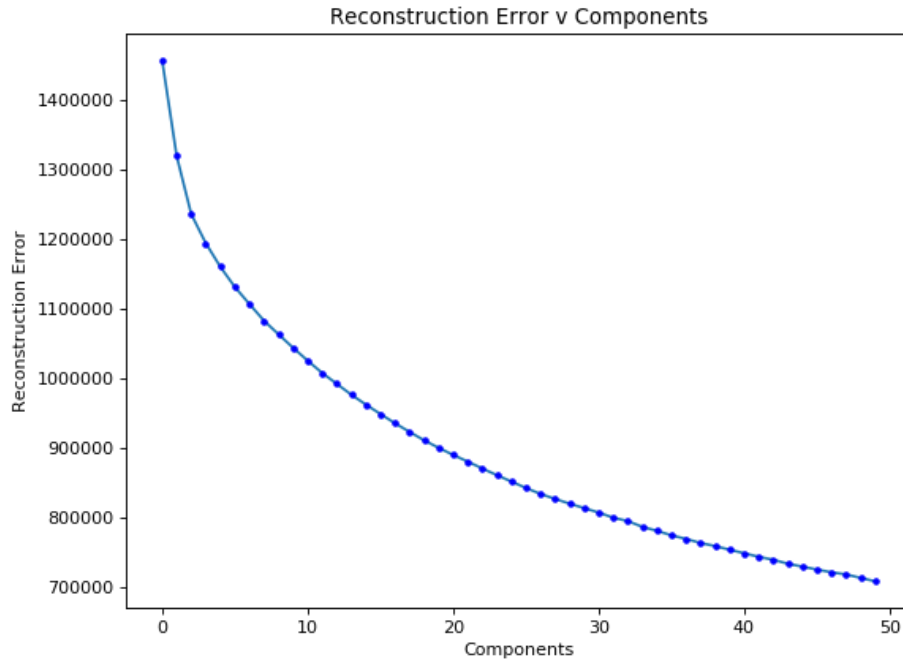

**Supplementary Figure 1: Reconstruction error across number of components,  $k$ .** Reconstruction error, measured by the difference between the original single-cell chromatin folding dataset and the NMF reconstructed approximation, across different values of  $k$  components. Adding more components reduces the reconstruction error as NMF can better capture patterns in the data at the expense of interpretability. An elbow is visible around  $k=15-20$  where adding additional components leads to diminishing returns in error reduction. We selected  $k=20$  components for our analysis to balance reconstruction accuracy and interpretability.

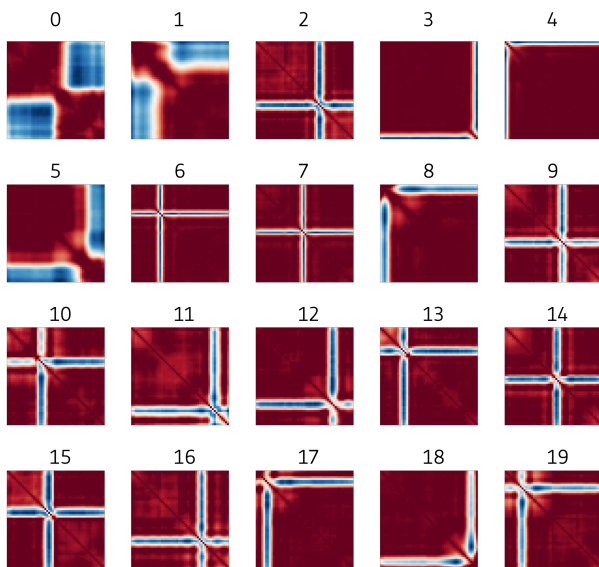

**Supplementary Figure 2: Components at BX-C locus.** All 20 components generated by applying NMF across the cells at this locus from the Mateo et al. dataset.

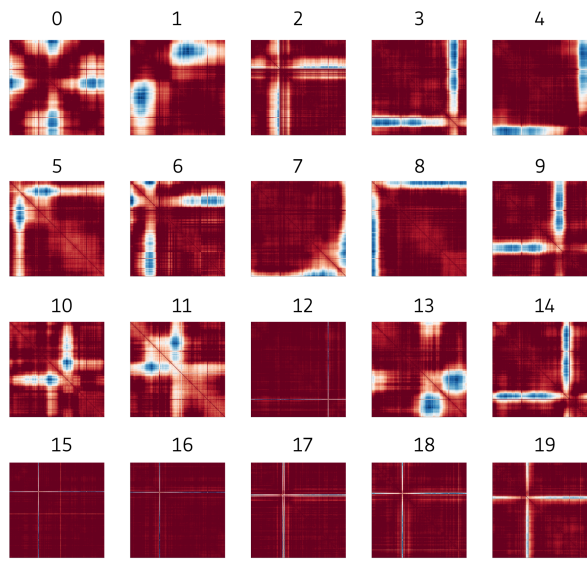

**Supplementary Figure 3: Components at HLCS locus.** All 20 components generated by applying NMF across the cells at this locus from the Su et al. dataset.
